# Supplementary material for: Taking promoters out of enhancers in sequence based predictions of tissue-specific mammalian enhancers
Source: PubMed Central journal article supplement (PMC5461523; doi:10.1186/s12920-017-0264-3), 2017-05-24
Supplement: 12920_2017_264_MOESM1_ESM.pdf [file 12920_2017_264_MOESM1_ESM.pdf]

# Supplementary materials for the paper entitled “Taking promoters out of enhancers in sequence based predictions of tissue-specific mammalian enhancers” by Julia Herman-Izycka, Michal Wlasnowolski and Bartek Wilczynski

| Cell type               | Modification                                                                      | Source                                                                                                                                                                                                                                |
|-------------------------|-----------------------------------------------------------------------------------|---------------------------------------------------------------------------------------------------------------------------------------------------------------------------------------------------------------------------------------|
| H1hesc                  |                                                                                   | <a href="ftp://ftp.ebi.ac.uk/pub/databases/ensembl/encode/integration_data_jan2011/byDataType/signal/jan2011/bigwig/">ftp://ftp.ebi.ac.uk/pub/databases/ensembl/encode/integration_data_jan2011/byDataType/signal/jan2011/bigwig/</a> |
|                         | H3k27ac                                                                           | <a href="#">wgEncodeBroadHistoneH1hescH3k27acStdAln_2Reps.norm5.rawsignal.bw</a>                                                                                                                                                      |
|                         | H3k27me3                                                                          | <a href="#">wgEncodeBroadHistoneH1hescH3k27me3StdAln_2Reps.norm5.rawsignal.bw</a>                                                                                                                                                     |
|                         | H3k36me3                                                                          | <a href="#">wgEncodeBroadHistoneH1hescH3k36me3StdAln_2Reps.norm5.rawsignal.bw</a>                                                                                                                                                     |
|                         | H3k4me1                                                                           | <a href="#">wgEncodeBroadHistoneH1hescH3k4me1StdAln_2Reps.norm5.rawsignal.bw</a>                                                                                                                                                      |
|                         | H3k4me2                                                                           | <a href="#">wgEncodeBroadHistoneH1hescH3k4me2StdAln_2Reps.norm5.rawsignal.bw</a>                                                                                                                                                      |
|                         | H3k4me3                                                                           | <a href="#">wgEncodeBroadHistoneH1hescH3k4me3StdAln_2Reps.norm5.rawsignal.bw</a>                                                                                                                                                      |
|                         | H3k9ac                                                                            | <a href="#">wgEncodeBroadHistoneH1hescH3k9acStdAln_2Reps.norm5.rawsignal.bw</a>                                                                                                                                                       |
| H4k20me1                | <a href="#">wgEncodeBroadHistoneH1hescH4k20me1StdAln_2Reps.norm5.rawsignal.bw</a> |                                                                                                                                                                                                                                       |
| GM12878                 |                                                                                   | <a href="ftp://ftp.ebi.ac.uk/pub/databases/ensembl/encode/integration_data_jan2011/byDataType/signal/jan2011/bigwig/">ftp://ftp.ebi.ac.uk/pub/databases/ensembl/encode/integration_data_jan2011/byDataType/signal/jan2011/bigwig/</a> |
|                         | H2az                                                                              | <a href="#">wgEncodeBroadHistoneGm12878H2azStdAln_2Reps.norm5.rawsignal.bw</a>                                                                                                                                                        |
|                         | H3k27ac                                                                           | <a href="#">wgEncodeBroadHistoneGm12878H3k27acStdAln_2Reps.norm5.rawsignal.bw</a>                                                                                                                                                     |
|                         | H3k27me3                                                                          | <a href="#">wgEncodeBroadHistoneGm12878H3k27me3StdAln_2Reps.norm5.rawsignal.bw</a>                                                                                                                                                    |
|                         | H3k36me3                                                                          | <a href="#">wgEncodeBroadHistoneGm12878H3k36me3StdAln_2Reps.norm5.rawsignal.bw</a>                                                                                                                                                    |
|                         | H3k4me1                                                                           | <a href="#">wgEncodeBroadHistoneGm12878H3k4me1StdAln_2Reps.norm5.rawsignal.bw</a>                                                                                                                                                     |
|                         | H3k4me2                                                                           | <a href="#">wgEncodeBroadHistoneGm12878H3k4me2StdAln_2Reps.norm5.rawsignal.bw</a>                                                                                                                                                     |
|                         | H3k4me3                                                                           | <a href="#">wgEncodeBroadHistoneGm12878H3k4me3StdAln_2Reps.norm5.rawsignal.bw</a>                                                                                                                                                     |
|                         | H3k79me2                                                                          | <a href="#">wgEncodeBroadHistoneGm12878H3k79me2StdAln_2Reps.norm5.rawsignal.bw</a>                                                                                                                                                    |
|                         | H3k9ac                                                                            | <a href="#">wgEncodeBroadHistoneGm12878H3k9acStdAln_2Reps.norm5.rawsignal.bw</a>                                                                                                                                                      |
|                         | H3k9me3                                                                           | <a href="#">wgEncodeBroadHistoneGm12878H3k9me3StdAln_3Reps.norm5.rawsignal.bw</a>                                                                                                                                                     |
|                         | H4k20me1                                                                          | <a href="#">wgEncodeBroadHistoneGm12878H4k20me1StdAln_2Reps.norm5.rawsignal.bw</a>                                                                                                                                                    |
| K562                    |                                                                                   | <a href="ftp://ftp.ebi.ac.uk/pub/databases/ensembl/encode/integration_data_jan2011/byDataType/signal/jan2011/bigwig/">ftp://ftp.ebi.ac.uk/pub/databases/ensembl/encode/integration_data_jan2011/byDataType/signal/jan2011/bigwig/</a> |
|                         | H2az                                                                              | <a href="#">wgEncodeBroadHistoneK562H2azStdAln_2Reps.norm5.rawsignal.bw</a>                                                                                                                                                           |
|                         | H3k27ac                                                                           | <a href="#">wgEncodeBroadHistoneK562H3k27acStdAln_2Reps.norm5.rawsignal.bw</a>                                                                                                                                                        |
|                         | H3k27me3                                                                          | <a href="#">wgEncodeBroadHistoneK562H3k27me3StdAln_2Reps.norm5.rawsignal.bw</a>                                                                                                                                                       |
|                         | H3k36me3                                                                          | <a href="#">wgEncodeBroadHistoneK562H3k36me3StdAln_2Reps.norm5.rawsignal.bw</a>                                                                                                                                                       |
|                         | H3k4me1                                                                           | <a href="#">wgEncodeBroadHistoneK562H3k4me1StdAln_2Reps.norm5.rawsignal.bw</a>                                                                                                                                                        |
|                         | H3k4me2                                                                           | <a href="#">wgEncodeBroadHistoneK562H3k4me2StdAln_2Reps.norm5.rawsignal.bw</a>                                                                                                                                                        |
|                         | H3k4me3                                                                           | <a href="#">wgEncodeBroadHistoneK562H3k4me3StdAln_2Reps.norm5.rawsignal.bw</a>                                                                                                                                                        |
|                         | H3k79me2                                                                          | <a href="#">wgEncodeBroadHistoneK562H3k79me2StdAln_2Reps.norm5.rawsignal.bw</a>                                                                                                                                                       |
|                         | H3k9ac                                                                            | <a href="#">wgEncodeBroadHistoneK562H3k9acStdAln_2Reps.norm5.rawsignal.bw</a>                                                                                                                                                         |
|                         | H3k9me1                                                                           | <a href="#">wgEncodeBroadHistoneK562H3k9me1StdAln_1Reps.norm5.rawsignal.bw</a>                                                                                                                                                        |
|                         | H3k9me3                                                                           | <a href="#">wgEncodeBroadHistoneK562H3k9me3StdAln_2Reps.norm5.rawsignal.bw</a>                                                                                                                                                        |
| H4k20me1                | <a href="#">wgEncodeBroadHistoneK562H4k20me1StdAln_2Reps.norm5.rawsignal.bw</a>   |                                                                                                                                                                                                                                       |
| CD20+                   |                                                                                   | <a href="#">hgdownload.cse.ucsc.edu/goldenPath/hg19/encodeDCC/wgEncodeBroadHistone/wgEncodeBroadHistoneCd20H2azSig.bigWig</a>                                                                                                         |
|                         | H2az                                                                              | <a href="#">wgEncodeBroadHistoneCd20H3k04me2Sig.bigWig</a>                                                                                                                                                                            |
|                         | H3k4me2                                                                           | <a href="#">wgEncodeBroadHistoneCd20ro01794H3k27acSig.bigWig</a>                                                                                                                                                                      |
|                         | H3k27ac                                                                           | <a href="#">wgEncodeBroadHistoneCd20ro01794H4k20me1Sig.bigWig</a>                                                                                                                                                                     |
| CD20+_RO01778           |                                                                                   | <a href="#">hgdownload.cse.ucsc.edu/goldenPath/hg19/encodeDCC/wgEncodeBroadHistone/wgEncodeUwHistoneCd20ro01778H3k04me3StdRawRep1.bigWig</a>                                                                                          |
|                         | H3k04me3                                                                          | <a href="#">wgEncodeUwHistoneCd20ro01778H3k04me3StdRawRep2.bigWig</a>                                                                                                                                                                 |
| CD20+_RO01794           |                                                                                   | <a href="#">hgdownload.cse.ucsc.edu/goldenPath/hg19/encodeDCC/wgEncodeBroadHistone/wgEncodeUwHistoneCd20ro01794H3k04me3StdRawRep3.bigWig</a>                                                                                          |
|                         | H3k04me3                                                                          | <a href="#">hgdownload.cse.ucsc.edu/goldenPath/hg19/encodeDCC/wgEncodeBroadHistone/wgEncodeUwHistoneCd20ro01794H3k04me3StdRawRep3.bigWig</a>                                                                                          |
| HUVEC                   |                                                                                   | <a href="#">hgdownload.cse.ucsc.edu/goldenPath/hg19/encodeDCC/wgEncodeBroadHistone/wgEncodeBroadHistoneHuvecH2azSig.bigWig</a>                                                                                                        |
|                         | H2az                                                                              | <a href="#">wgEncodeBroadHistoneHuvecH3k09me3Sig.bigWig</a>                                                                                                                                                                           |
|                         | H3k09me3                                                                          | <a href="#">wgEncodeBroadHistoneHuvecH3k27acStdSig.bigWig</a>                                                                                                                                                                         |
|                         | H3k27ac                                                                           | <a href="#">wgEncodeBroadHistoneHuvecH3k27me3StdSig.bigWig</a>                                                                                                                                                                        |
|                         | H3k27me3                                                                          | <a href="#">wgEncodeBroadHistoneHuvecH3k36me3StdSig.bigWig</a>                                                                                                                                                                        |
|                         | H3k36me3                                                                          | <a href="#">wgEncodeBroadHistoneHuvecH3k4me1StdSig.bigWig</a>                                                                                                                                                                         |
|                         | H3k4me1                                                                           | <a href="#">wgEncodeBroadHistoneHuvecH3k4me2StdSig.bigWig</a>                                                                                                                                                                         |
|                         | H3k4me2                                                                           | <a href="#">wgEncodeBroadHistoneHuvecH3k4me3StdSig.bigWig</a>                                                                                                                                                                         |
|                         | H3k4me3                                                                           | <a href="#">wgEncodeBroadHistoneHuvecH3k79me2Sig.bigWig</a>                                                                                                                                                                           |
|                         | H3k79me2                                                                          | <a href="#">wgEncodeBroadHistoneHuvecH3k9acStdSig.bigWig</a>                                                                                                                                                                          |
|                         | H3k9ac                                                                            | <a href="#">wgEncodeBroadHistoneHuvecH3k9me1StdSig.bigWig</a>                                                                                                                                                                         |
|                         | H3k9me1                                                                           | <a href="#">wgEncodeBroadHistoneHuvecH4k20me1StdSig.bigWig</a>                                                                                                                                                                        |
|                         | H4k20me1                                                                          | <a href="#">hgdownload.cse.ucsc.edu/goldenPath/hg19/encodeDCC/wgEncodeUwHistone/wgEncodeUwHistoneHuvecH3k27me3StdRawRep1.bigWig</a>                                                                                                   |
|                         | H3k27me3                                                                          | <a href="#">wgEncodeUwHistoneHuvecH3k27me3StdRawRep2.bigWig</a>                                                                                                                                                                       |
|                         | H3k36me3                                                                          | <a href="#">wgEncodeUwHistoneHuvecH3k36me3StdRawRep1.bigWig</a>                                                                                                                                                                       |
|                         | H3k4me3                                                                           | <a href="#">wgEncodeUwHistoneHuvecH3k36me3StdRawRep2.bigWig</a>                                                                                                                                                                       |
|                         | H3k4me3                                                                           | <a href="#">wgEncodeUwHistoneHuvecH3k4me3StdRawRep1.bigWig</a>                                                                                                                                                                        |
|                         | H3k4me3                                                                           | <a href="#">wgEncodeUwHistoneHuvecH3k4me3StdRawRep2.bigWig</a>                                                                                                                                                                        |
|                         | H3k27ac                                                                           | <a href="ftp://ftp.ebi.ac.uk/pub/databases/ensembl/encode/integration_data_jan2011/byDataType/signal/jan2011/bigwig/">ftp://ftp.ebi.ac.uk/pub/databases/ensembl/encode/integration_data_jan2011/byDataType/signal/jan2011/bigwig/</a> |
|                         | H3k27me3                                                                          | <a href="#">wgEncodeBroadHistoneHuvecH3k27acStdAln_3Reps.norm5.rawsignal.bw</a>                                                                                                                                                       |
| H3k36me3                | <a href="#">wgEncodeBroadHistoneHuvecH3k27me3StdAln_2Reps.norm5.rawsignal.bw</a>  |                                                                                                                                                                                                                                       |
| H3k4me1                 | <a href="#">wgEncodeBroadHistoneHuvecH3k36me3StdAln_3Reps.norm5.rawsignal.bw</a>  |                                                                                                                                                                                                                                       |
| H3k4me2                 | <a href="#">wgEncodeBroadHistoneHuvecH3k4me1StdAln_3Reps.norm5.rawsignal.bw</a>   |                                                                                                                                                                                                                                       |
| H3k4me3                 | <a href="#">wgEncodeBroadHistoneHuvecH3k4me2StdAln_2Reps.norm5.rawsignal.bw</a>   |                                                                                                                                                                                                                                       |
| H3k9ac                  | <a href="#">wgEncodeBroadHistoneHuvecH3k4me3StdAln_3Reps.norm5.rawsignal.bw</a>   |                                                                                                                                                                                                                                       |
| H3k9me1                 | <a href="#">wgEncodeBroadHistoneHuvecH3k9acStdAln_3Reps.norm5.rawsignal.bw</a>    |                                                                                                                                                                                                                                       |
| H3k9me3                 | <a href="#">wgEncodeBroadHistoneHuvecH3k9me1StdAln_3Reps.norm5.rawsignal.bw</a>   |                                                                                                                                                                                                                                       |
| H4k20me1                | <a href="#">wgEncodeBroadHistoneHuvecH4k20me1StdAln_3Reps.norm5.rawsignal.bw</a>  |                                                                                                                                                                                                                                       |
| Monocytes-CD14+_RO01746 |                                                                                   | <a href="#">hgdownload.cse.ucsc.edu/goldenPath/hg19/encodeDCC/wgEncodeBroadHistone/wgEncodeBroadHistoneMonocd14ro1746H2azSig.bigWig</a>                                                                                               |
|                         | H2az                                                                              | <a href="#">wgEncodeBroadHistoneMonocd14ro1746H3k04me1Sig.bigWig</a>                                                                                                                                                                  |
|                         | H3k04me1                                                                          | <a href="#">wgEncodeBroadHistoneMonocd14ro1746H3k04me2Sig.bigWig</a>                                                                                                                                                                  |
|                         | H3k04me2                                                                          | <a href="#">wgEncodeBroadHistoneMonocd14ro1746H3k04me3Sig.bigWig</a>                                                                                                                                                                  |
|                         | H3k04me3                                                                          | <a href="#">wgEncodeBroadHistoneMonocd14ro1746H3k09acSig.bigWig</a>                                                                                                                                                                   |
|                         | H3k09ac                                                                           | <a href="#">wgEncodeBroadHistoneMonocd14ro1746H3k09me3Sig.bigWig</a>                                                                                                                                                                  |
|                         | H3k09me3                                                                          | <a href="#">wgEncodeBroadHistoneMonocd14ro1746H3k27acSig.bigWig</a>                                                                                                                                                                   |
|                         | H3k27ac                                                                           | <a href="#">wgEncodeBroadHistoneMonocd14ro1746H3k27me3Sig.bigWig</a>                                                                                                                                                                  |
|                         | H3k27me3                                                                          | <a href="#">wgEncodeBroadHistoneMonocd14ro1746H3k36me3Sig.bigWig</a>                                                                                                                                                                  |
|                         | H3k36me3                                                                          | <a href="#">wgEncodeBroadHistoneMonocd14ro1746H3k79me2Sig.bigWig</a>                                                                                                                                                                  |
|                         | H3k79me2                                                                          | <a href="#">wgEncodeBroadHistoneMonocd14ro1746H4k20me1Sig.bigWig</a>                                                                                                                                                                  |
|                         | H4k20me1                                                                          | <a href="#">hgdownload.cse.ucsc.edu/goldenPath/hg19/encodeDCC/wgEncodeUwHistone/wgEncodeUwHistoneMonocd14ro1746H3k04me3StdRawRep1.bigWig</a>                                                                                          |
|                         | H3k04me3                                                                          | <a href="#">wgEncodeUwHistoneMonocd14ro1746H3k04me3StdRawRep1.bigWig</a>                                                                                                                                                              |
|                         | H3k27me3                                                                          | <a href="#">wgEncodeUwHistoneMonocd14ro1746H3k27me3StdRawRep1.bigWig</a>                                                                                                                                                              |

Table S1: Histone modification tracks from ENCODE used in analysis.

| Tissue                                                                   | # sequences in VISTA | after filtering |
|--------------------------------------------------------------------------|----------------------|-----------------|
| heart                                                                    | 91                   | 78              |
| brain<br>(hindbrain, midbrain, forebrain,<br>neural tube, cranial nerve) | 571                  | 558             |
| non-specific (heart + brain)                                             | 649                  | 636             |

Table S2: Training set sizes

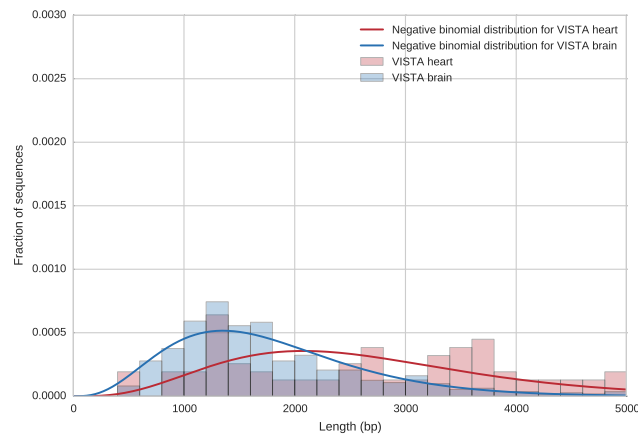

Figure S3: Lengths of sequences from VISTA database with fitted distribution.  
Heart (and not brain): mean=2651.74, variance=1525898.65  
Brain (and not heart): mean=1770.32, variance=743470.65

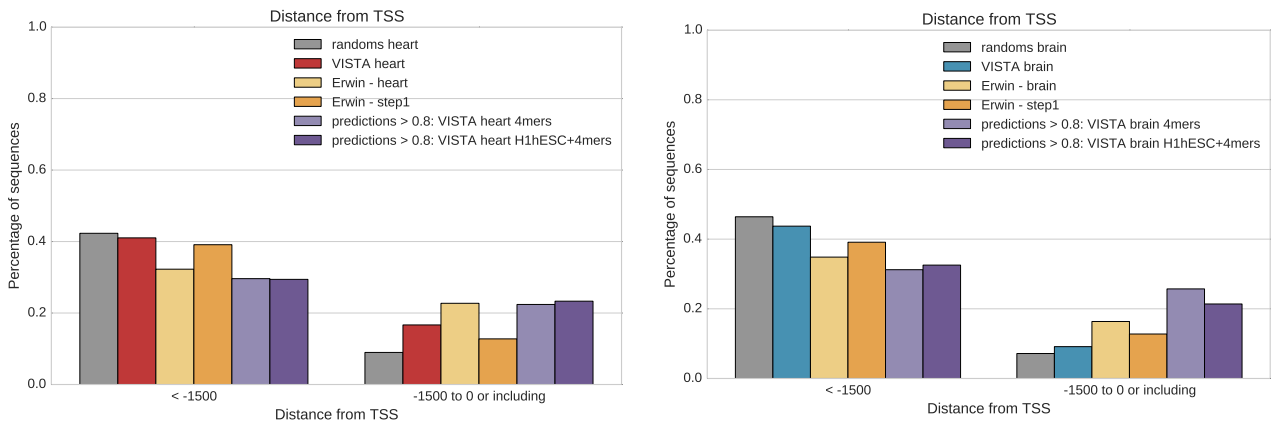

Figure S4: Fraction of sequences in datasets with specific distance to closest TSS.

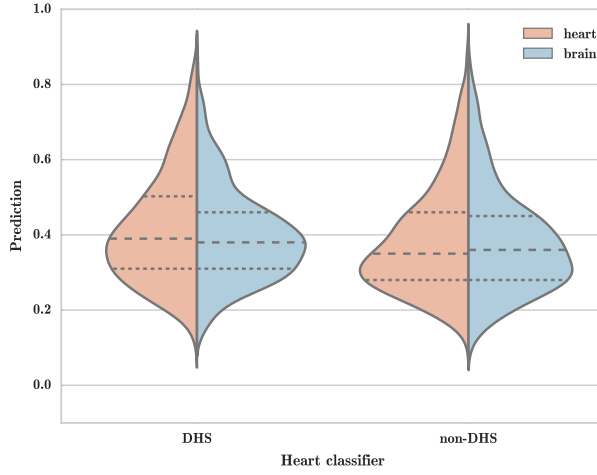

Figure S5: Distribution of whole-genome prediction values for DNase Hypersensitive Sites windows specific to heart and brain (promoters and heart&brain DHS removed) and non-DHS windows.

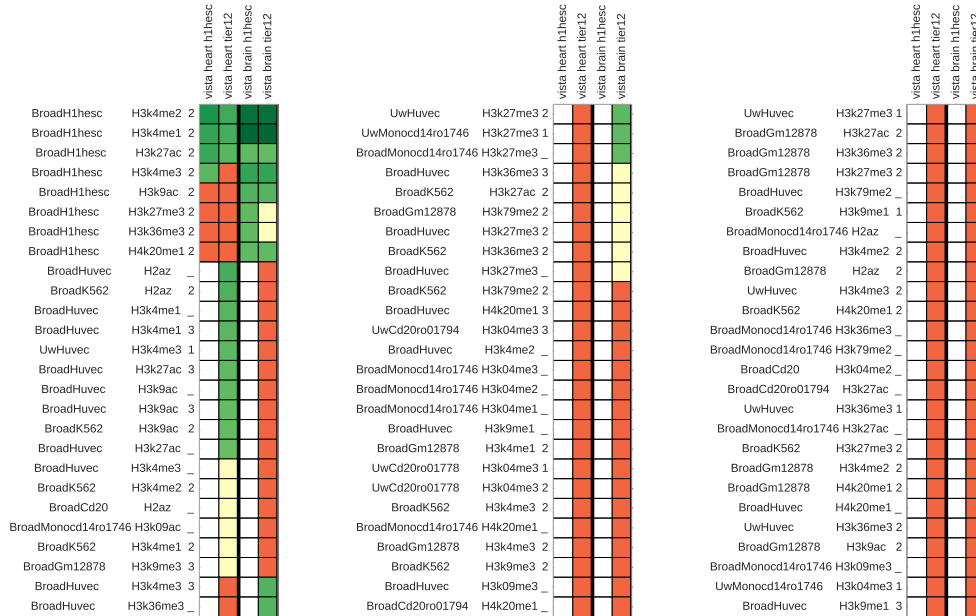

Figure S6: Feature importance by Boruta algorithm  
Comparison of important 4-mers (first figure) and histone modifications (second figure) for tissue-specific 4-mers classifiers (without histone modifications, with H1hESC and with Tier1&2). Important features in green, Unimportant in red and Tentative in yellow.

| element ID | tissue | Classifier |                 |                  |               |        |                 |                  |               |
|------------|--------|------------|-----------------|------------------|---------------|--------|-----------------|------------------|---------------|
|            |        | heart      |                 |                  |               | brain  |                 |                  |               |
|            |        | 4-mers     | 4-mers + H1hesc | 4-mers + Tier1&2 | 2-step 4-mers | 4-mers | 4-mers + H1hesc | 4-mers + Tier1&2 | 2-step 4-mers |
| 2315       | brain  | 0.57       | 0.57            | 0.39             | 0.2025        | 0.96   | 0.74            | 0.68             | 0.4005        |
| 2318       | brain  | 0.39       | 0.38            | 0.41             | 0.3026        | 0.7    | 0.86            | 0.76             | 0.6408        |
| 2319       | brain  | 0.5        | 0.62            | 0.61             | 0.315         | 0.68   | 0.81            | 0.79             | 0.5175        |
| 2330       | heart  | 0.61       | 0.76            | 0.7              | 0.495         | 0.79   | 0.64            | 0.5              | 0.5775        |
| 2353       | heart  | 0.6        | 0.63            | 0.8              | 0.304         | 0.44   | 0.51            | 0.54             | 0.184         |
| 2357       | heart  | 0.76       | 0.7             | 0.77             | 0.2272        | 0.69   | 0.51            | 0.56             | 0.2112        |
| 2384       | heart  | 0.75       | 0.71            | 0.82             | 0.1343        | 0.7    | 0.39            | 0.34             | 0.1207        |
| 2414       | heart  | 0.46       | 0.43            | 0.45             | 0.3348        | 0.92   | 0.42            | 0.43             | 0.5642        |

Table S7: Predictions for recently added VISTA enhancers given by various classifiers analysed in this paper.

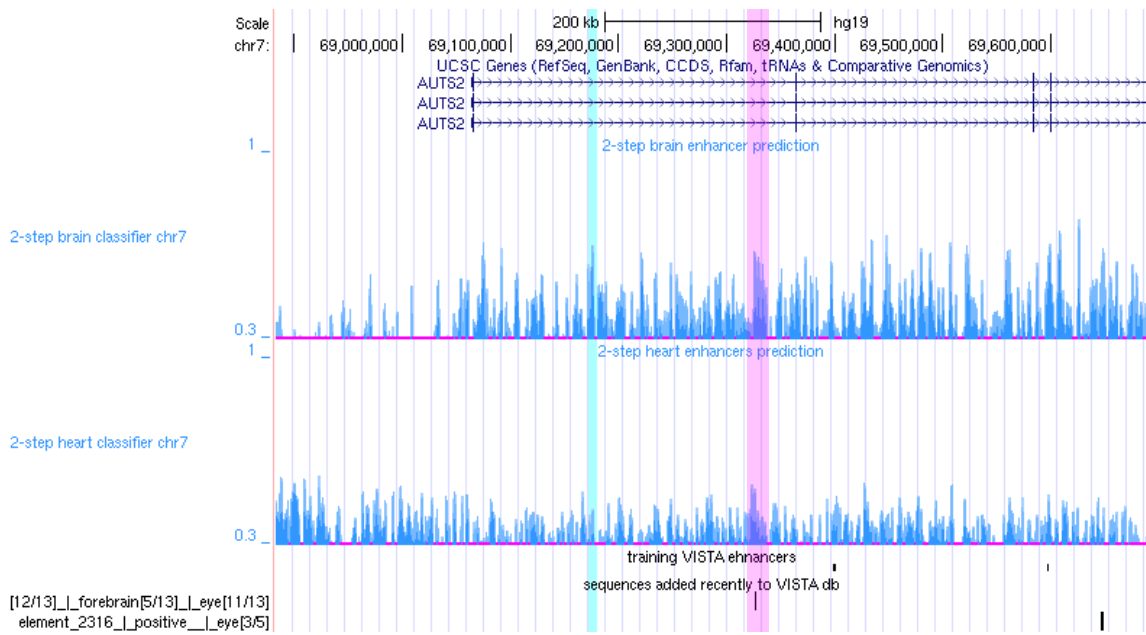

Figure S8: Example of region containing brain enhancer. We highlighted one of regions with high brain prediction, and low heart (in blue). Another such region (in pink) overlaps VISTA brain enhancer, which was not part of training set. Both regions are located inside autism-related gene AUTS2.

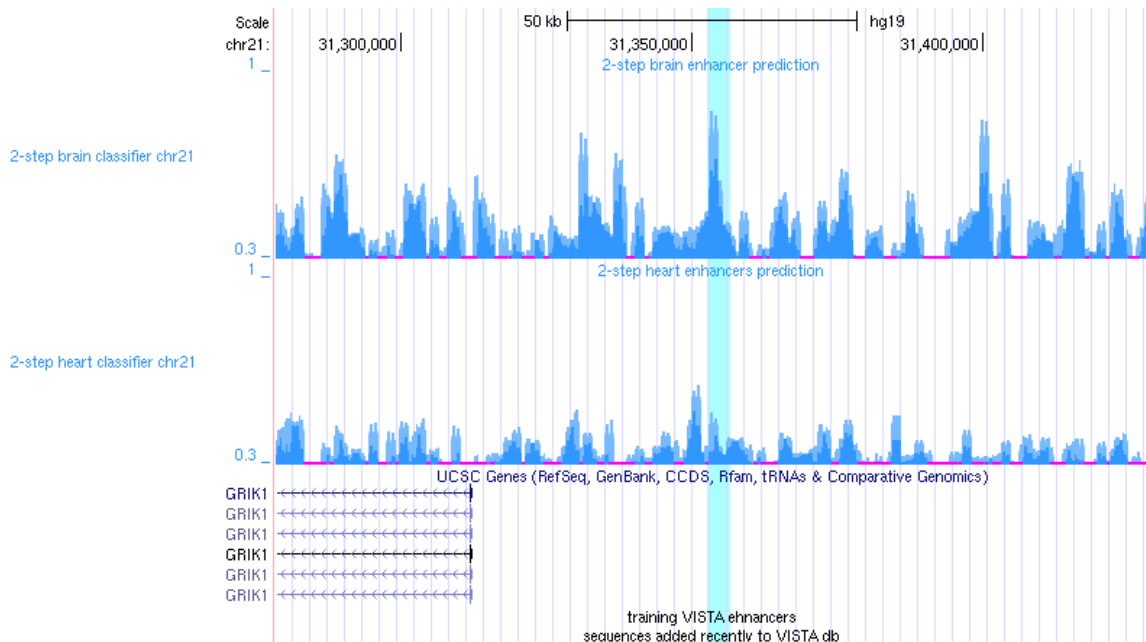

Figure S9: Example of region containing brain enhancer prediction. We highlighted one of regions with high brain prediction, and low heart. Region is located in proximity of glutamate receptor gene GRIK1.

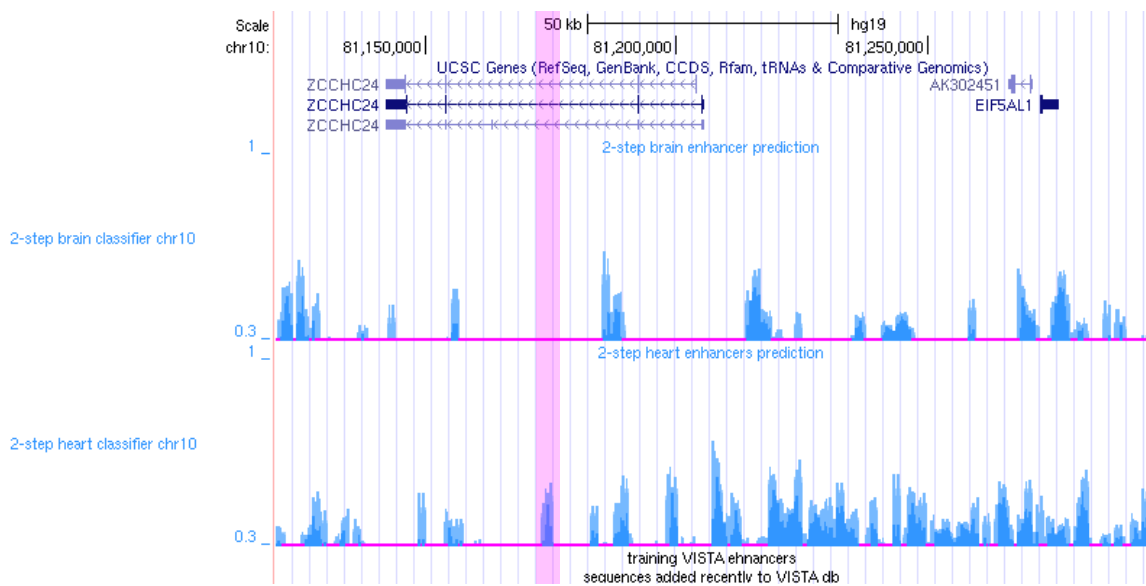

Figure S10: Example of region containing heart enhancer prediction (highlighted in pink) located inside one of introns of gene ZCCHC24 (Zinc Finger CCHC Domain-Containing Protein 24).
